# Supplementary material
Source: PubMed Central journal article supplement (PMC5962431)
Supplement: NIHMS958577-supplement.pdf [file NIHMS958577-supplement.pdf]

**Appendix**  
**Associations of Prenatal and Child Sugar Intake With Child Cognition**  
**Cohen et al.**

**Appendix Table 1.** Associations of Maternal Diet Soda Consumption (Mean First and Second Trimester) and Child Fructose and Fruit Consumption With Child Cognition in Early (Median 3.3 Years) and Mid-Childhood (Median 7.7 Years) Alternatively Modeled as Quartiles

| Consumption quartiles                 | $\beta$ (95% CI) <sup>a</sup> |
|---------------------------------------|-------------------------------|
| <b>Maternal diet soda consumption</b> |                               |
| KBIT-II verbal, mid-childhood         |                               |
| Q1                                    | 0.0 (ref)                     |
| Q2                                    | −0.9 (−3.0, 1.1)              |
| Q3                                    | −2.7 (−5.0, −0.3)             |
| Q4                                    | −6.5 (−9.8, −3.2)             |
| <b>Child fructose consumption</b>     |                               |
| PPVT-III, early childhood             |                               |
| Q1                                    | 0.0 (ref)                     |
| Q2                                    | 1.0 (−1.3, 3.3)               |
| Q3                                    | 2.7 (0.4, 5.0)                |
| Q4                                    | 2.6 (0.3, 4.8)                |
| <b>Child fruit consumption</b>        |                               |
| PPVT-III, early childhood             |                               |
| Q1                                    | 0.0 (ref)                     |
| Q2                                    | 1.4 (−0.9, 3.7)               |
| Q3                                    | 2.4 (0.1, 4.7)                |
| Q4                                    | 2.9 (0.5, 5.3)                |

KBIT-II, Kaufman Brief Intelligence Test, second edition; PPVT-III, Peabody Picture Vocabulary Test, third edition; Q, quartile

<sup>a</sup>Adjusted for maternal age, pre-pregnancy BMI, parity, college graduate, fish intake (average of first and second trimester), smoking during pregnancy, household income at enrollment >\$70,000, and child sex and race/ethnicity. Child exposures additionally adjusted for birth weight for gestational age z-score and corresponding intake during pregnancy.
